# Supplementary material for: Satellite observations of gravity wave momentum flux in the mesosphere / lower thermosphere (MLT): feasibility and requirements
Source: Copernicus journal article supplement (doi:10.5194/amt-2022-224), 2022-08-03
Supplement: Supplementary file [file amt-2022-224-AC2-supplement.pdf]

# Response to the referee comments

We thank the referees for their valuable and helpful comments. We have addressed all of them one-by-one in details as listed below. The comments are in bold and our replies are in regular font. The page/line numbers indicated in our replies are given with respect to the old manuscript, and may differ from the revised manuscript.

## Referee #2

### General comments:

**The manuscript investigates requirements for satellite limb optical measurements using O<sub>2</sub> A-band emissions to retrieve characteristics of gravity waves (GWs) and GW momentum flux that strongly influences global circulation in the middle and upper atmosphere. The manuscript is mainly based on modelling results. The present study is very useful and worth publication. However, the text is rather demanding to read, partly due to the complexity of the problem. Nevertheless, I believe that some formulations could be simplified, some points better explained and specified or located in more convenient places in the text. I provide several examples in the specific comments below, but I encourage the authors not to limit themselves to them only. I recommend a moderate revision.**

The referee's comments helped us to improve our manuscript. We revised the manuscript thoroughly, reduced/simplified the side-topics and rephrased some parts of the text to make them more clear. Specifically, we excluded Appendix A since the discussed scale-separation method was actually not used in our study. The explanation about the Key Quantity – zonal mean GW momentum flux was updated in the Introduction and Sect. 2.2. The description of the interferogram split method in Sect. 3.5 was reformulated. In the Discussion section, we included the discussions about the existing satellite observations and their limitations, as well as the global wind data availability in the MLT region.

32 **Specific comments**

33 **1. Introduction (for example in Key Quantities), the authors only**  
34 **speak about zonal GW momentum flux and direction distribution**  
35 **of the flux. Does the direction only mean the sign of zonal flux,**  
36 **or also the meridional component. Please explain and reformulate.**  
37 **Why is the meridional component not mentioned in the Introduc-**  
38 **tion section when it is shown in some Figures of the following**  
39 **Sections?**

40 For the Key Quantities we considered the zonal mean GW momentum flux,  
41 i.e., the zonally averaged vertical flux of horizontal momentum of GWs, since  
42 it can be directly inferred from the wind data and can thus serve as an ab-  
43 solute reference for global GW characterization, described in more detail in  
44 Section 2.2. The direction refers to the sign of the zonal mean GW momen-  
45 tum flux, which itself consists of two components: zonal component  $F_{px}$  and  
46 meridional component  $F_{py}$ . The two, i.e., zonal and meridional, components  
47 of zonal mean GW momentum flux are illustrated in left and right panels  
48 respectively in Fig.9 and Fig.13-16.

49 Regarding to the referee's comment, we added the detailed explanation in  
50 former 1.94-96 in the Introduction:

51 "In order to close the momentum budget, in particular the zonal mean of the  
52 zonal GW momentum flux is required, but zonal mean meridional momentum  
53 flux may contribute as well (Ern et al., 2013). ...

54 For our study the zonal mean of zonal GW momentum flux is of particular  
55 importance as the values directly inferred from the winds provide a true refer-  
56 ence value. This is, to a somewhat lesser degree, also true for the meridional  
57 momentum flux, as will be discussed below."

58 **2. It is difficult to understand, namely in the Introduction, why**  
59 **"by separately inverting left-hand and right-hand part of the in-**  
60 **terferogram", independent observation tracks are obtained. Please**  
61 **reformulate or explain better here.**

62 For a better understanding, we reformulated this sentence as "by splitting  
63 one interferogram into two left-hand and right-hand parts and separately  
64 mirroring each parts (cf. Sect. 3.5), " in former 1.137 in the Introduction and  
65 referred to the corresponding Section 3.5 for a detailed method description.

66 **3. line 190,  $u', v', w'$ , define the coordinate system.**

67 As recommended, we added the definition of the coordinate system after  
68 former 1.190.

69 **4. Section 2.2. Last sentence. It is partly explained in the Dis-**  
70 **cussion, but here, the meaning of this sentence is quite unclear.**  
71 **Please reformulate/explain or remove.**

72 Following the referee's suggestion, we removed the last sentence from Sect. 2.2.

73 **5. line 210, S3D, it should be defined here at the first usage.**

74 As recommended, we added the definition of S3D after former l.210.

75 **6. Section 3.1, around line 241, "... moist convection..." The moist**  
76 **convection at such high altitudes deserves some explanation.**

77 Though of course there is no moist convection at the observation altitude it  
78 is one of the important sources of the waves which govern this height region:  
79 GWs, tides and equatorial wave modes. This explanation was included in  
80 the revised text after former l.241.

81 **7. Section 3.3. A comparison of usable height ranges for day- and**  
82 **night-time observation should be discussed in more detail.**

83 We considered for the daytime an observation altitude region of 60-120 km,  
84 which was reduced to the range of 80 km to 100 km during nighttime as only  
85 the photochemical production channel exists.

86 We added the corresponding description about the altitude range at the end  
87 of Section 3.3.

88 **In addition, HAMMONIA model should be briefly introduced and/or**  
89 **referenced.**

90 We added the reference to the HAMMONIA model data in former l.283.

91 **8. Section 3.5. It should be better explained how two independent**  
92 **temperatures are obtained along the horizontal axis using O<sub>2</sub> A-**  
93 **band emissions only.**

94 For clarification, we reformulated most of the description about the interfer-  
95 ogram split method in Section 3.5.

96 **9. last line on page 15, "... retrieved temperatures, which are about**  
97 **17 km apart..." That doesn't make sense to me. Please reformu-**  
98 **late.**

99 This comment is related to the previous one. We have reformulated most of  
100 Sect. 3.5, which should make this point much clearer.

101 **10. Section 3.6. Specify the time interval over which the snapshots**  
102 **used for the tomography are taken. Discuss this time interval with**  
103 **respect to the GW period/wavelength and propagation velocity.**  
104 **Discuss also the assumed angle difference between different posi-**  
105 **tions marked by different colors in Figure 8.**

106 Looking at the individual "rays" of measurements from the simulations, one  
107 can analyse, where an overlap occurs. For the given geometry, overlaps occur  
108 for measurements up to 160s apart. This largest time difference for this  
109 backwards-looking instrument occurs between measurements at high angles,  
110 i.e. tangent point altitude at 120km, and later measurements at low angles,  
111 i.e. tangent point altitudes at 70km.

112 As most information is gained from the emissions around the tangent point,  
113 the practical time delta is more in the order of 80s.

114 This is at least one order of magnitude smaller than the periods of GWs that  
115 our proposed instrument is sensitive to: We aim at GWs of  $\lambda_h > 100$  km and  
116  $\lambda_z \approx 10$  km which corresponds to an intrinsic period of roughly one hour.  
117 By Doppler shift shorter ground based periods may occur, but it is expected  
118 that the bulk of the observed GWs has ground-based periods of a few hours.

119 The angular differences are rather small for a tomographic method and form  
120 an extreme case of limited-angle-tomography. For the proposed retrieval  
121 scheme, the different overlaps of line-of-sights as well as the exponential in-  
122 crease of number densities to lower altitudes are more important for locali-  
123 sation of information.

124 We added the following sentence to the main text in former l.385:

125 "The satellite speed allows to gather all relevant measurements for on spatial  
126 sample in the order of minutes, which is short compared to typical periods  
127 of gravity waves observable by our instrument."

128 **11. Section 3.6 or 3.7 (Table 2). Note that the definition of spectral**  
129 **wavenumbers (in  $\text{cm}^{-1}$ ) is  $1/\lambda$  here, where  $\lambda$  is the wavelength, and**  
130 **not  $2\pi/\lambda$  which is often used.**

131 We added a footnote in Table 2 for to remind of the definition of spectral  
132 wavenumber.

133 **12. line 393, define FWHM**

134 We added the definition of FWHM in former l.393.

135 **13. Section 3.7, last but one paragraph. The text is difficult to**  
136 **read. Please reformulate/simplify.**

137 Following the referee’s suggestion, we rephrased this paragraph as below:

138 “The synthetic observation data have a fixed sampling in  $x$ ,  $y$  and  $z$  direction,  
139 on which the analysis cube size is defined via the number of sampling points.  
140 For the model data, a fixed model sampling in terms of degrees longitude in  
141 zonal direction means a coarser (in distance) sampling close to the equator  
142 and a finer sampling at high latitudes due to the shorter distance between two  
143 respective longitudes at higher latitudes. Therefore, the size of a fixed cube  
144 is specified in kilometers instead of degrees and the number of fitting points  
145 is adapted accordingly. This ensures that the same part of the spectrum is  
146 targeted independent of latitude along the longitude direction.”

147 **14. Section 4.2.1, second paragraph “ From the model set-up we**  
148 **expect shortest horizontal wavelengths of O(200km) . . . ” It should**  
149 **be discussed here that a number of radio and optical observations**  
150 **show shorter wavelengths than 200 km (Nishioka et al., 2013; Chum**  
151 **et al., 2021; Shiokawa et al., 2009; among others).**

152 For various reasons we would have preferred, of course, a model with higher  
153 resolution encompassing the entire MLT. At the end we have to take what  
154 is feasible nowadays. The fact that short waves must not be neglected, has  
155 been now included in Sect. 4.2.1 after former l.477 and also in the discussion  
156 after former l.643.

157 **The authors partly discuss this wavelength limit in the Discussion**  
158 **section and in Appendix E, but this information should be briefly**  
159 **given already here. Moreover, the Discussion section mainly relies**  
160 **on modelling. The already available observations should also be**  
161 **mentioned.**

162 **Chum, J., Podolská, K., Rusz, J., Baše, J., Tedoradze, N. (2021),**  
163 **Statistical investigation of gravity wave characteristics in the iono-**  
164 **sphere. Earth Planets Space 73, 60, [https://doi.org/10.1186/s40623-](https://doi.org/10.1186/s40623-021-01379-3)**  
165 **021-01379-3**

166 **Nishioka M, Tsugawa T, Kubota M, Ishii M (2013) Concentric**  
167 **waves and short-period oscillations observed in the ionosphere after**  
168 **the 2013 Moore EF5 tornado. Geophys Res Lett. [https://doi.org/](https://doi.org/10.1002/2013GL057963)**  
169 **10.1002/2013GL057963**

170 **Shiokawa K, Otsuka Y, Ogawa T (2009) Propagation characteris-**  
171 **tics of nighttime mesospheric and thermospheric waves observed by**  
172 **optical mesosphere thermosphere imagers at middle and low lati-**  
173 **tudes. Earth Planets Space 61:479–491. [https://doi.org/10.1186/BF033](https://doi.org/10.1186/BF03353165)**  
174 **53165**

175 True. we have included also a reference to both short and mesoscale wave-  
176 length observations in the discussion. This hopefully clarifies that we need  
177 to have new observations in order to identify the relative contribution of  
178 different scales.

179 **15. Figure 13. Specify the time interval (season) for which the**  
180 **Figure was constructed.**

181 We added in the caption “01-Jan-2016 06 UT” and in the text in former  
182 l.541: ”for 01-Jan-2016 06 UT (i.e., winter in the northern hemisphere and  
183 summer in the southern hemisphere)” to specify the season in Fig. 13.

184 **16. line 622, “ tides cause changes of the large scale winds at similar**  
185 **time scales as the periods of the GWs propagating through these**  
186 **winds ”. Specify the periods of tides and GWs considered here.**

187 We added “e.g., diurnal and semi-diurnal tides,” in former l.622 to specify  
188 the periods.

## 189 **References**

190 Ern, M., Arras, C., Faber, A., Fröhlich, K., Jacobi, C., Kalisch, S., Krebs-  
191 bach, M., Preusse, P., Schmidt, T. and Wickert, J. (2013), Vertical cou-  
192 pling by gravity waves in atmospheric dynamics: Observations, ray tracing,  
193 and implications for global modeling, *in* Franz-Josef Lübken, ed., ‘Climate  
194 and Waether of the Sun-Earth System (CAWSES)’, Springer Atmospheric  
195 Sciences, Dordrecht, Netherlands, pp. 383–408.
